# Supplementary material for: Beet Necrotic Yellow Vein Virus Noncoding RNA Production Depends on a 5′→3′ Xrn Exoribonuclease Activity
Source: MDPI journal article supplement (doi:10.3390/v10030137), 2018-03-19
Supplement: s1 [file s1]

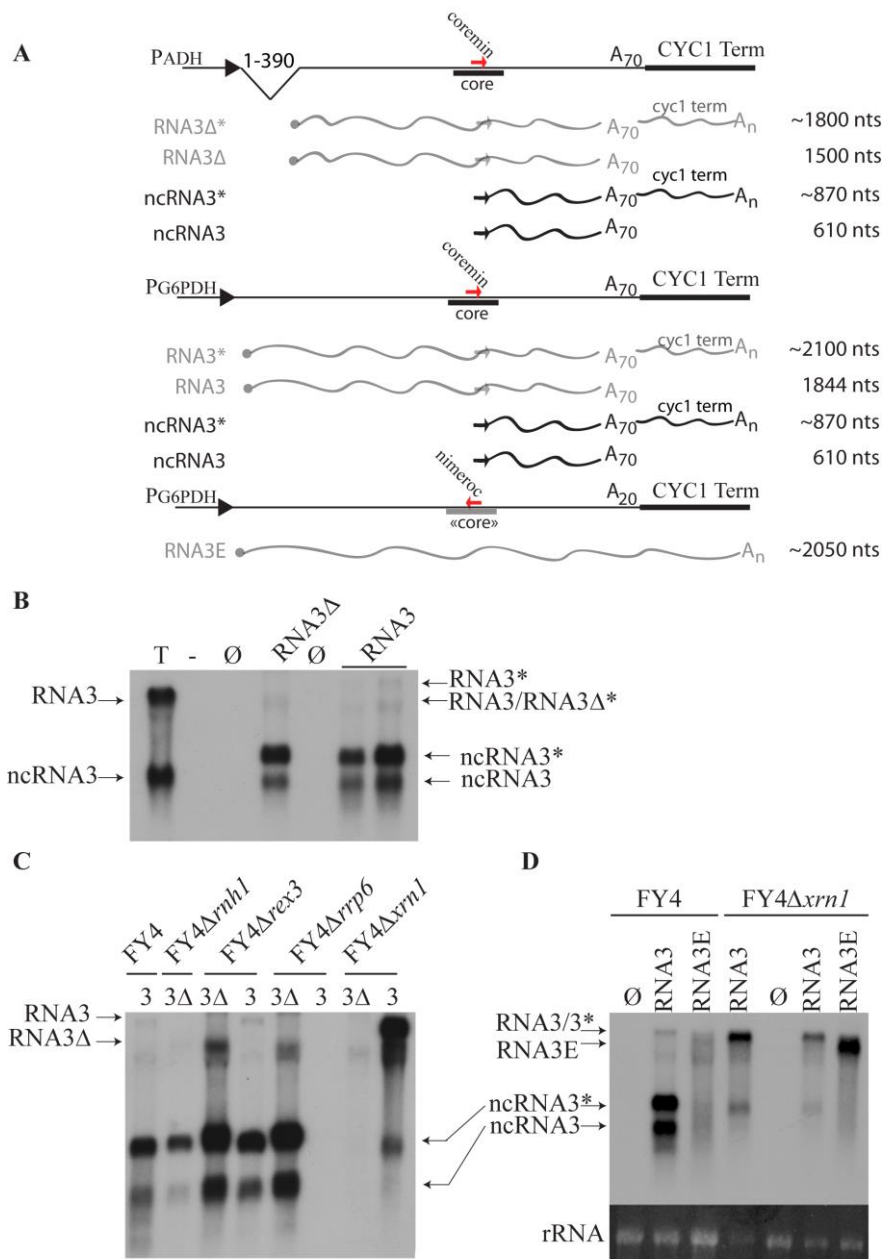

**Figure S1. Expression of BNYVV RNA3 species in *Saccharomyces cerevisiae*.** (A) Drawing of the expression vectors used to transform yeasts. ADH and G6PDH promoters depicted as black arrows drive the transcription of RNA3 or RNA3 truncated ( $\Delta$ ) of its 5' UTR that appears as a broken line. The "coremin" motif and its reverse complement sequence are represented as sense and antisense red arrows. Grey filled circle corresponds to the cap and A<sub>70</sub> and A<sub>20</sub> correspond to the number of Adenosine residues. CYC1 term is the terminator sequence. A<sub>n</sub> corresponds to the polyA tail added *in vivo*. Sizes of the RNA species are depicted. RNA3\* differs from RNA3 by the presence of the cyc1 terminator and polyA sequences -See Fig1C - (B-D). RNA3 species were detected by northern blotting of total RNAs issued from wild-type FY4 yeast (B and D) and nucleases mutants FY4 $\Delta$ rnh1, FY4 $\Delta$ rex3, FY4 $\Delta$ rrp6 (C) and FY4 $\Delta$ xrn1 (C and D). The probe was complementary to the 3' UTR of RNA3. (-) unloaded; Ø, empty vector 5  $\mu$ g of RNA were loaded (panel C to D). Ethidium bromide staining is only available for panel D (rRNA). T corresponds to RNAs issued from BNYVV infected plant and is used as a position marker (B).
